# Supplementary material for: The Assessment of the Maturity of Informatization in Assembly-Building Projects Utilizing the CMM-CME Methodology, Taking a Project in China as an Illustration
Source: MDPI journal article supplement (doi:10.3390/buildings14040918), 2024-03-27
Supplement: s1 [file s1]

Archive with 1 entries (1 files):
- Supplemental Materials.pdf
