# Supplementary material for: The Assessment of the Maturity of Informatization in Assembly-Building Projects Utilizing the CMM-CME Methodology, Taking a Project in China as an Illustration
Source: MDPI journal article supplement (doi:10.3390/buildings14040918), 2024-03-27
Supplement: s1 [file s1 › Supplemental Materials.pdf]

## Supplemental Materials

Table S1. Initial screening of key practices

| Serial number | Key practices based on literature screening                                       | Key practices based on normative screening | Treatment     | Disposal results                                                                  |
|---------------|-----------------------------------------------------------------------------------|--------------------------------------------|---------------|-----------------------------------------------------------------------------------|
| 1             | Extent of application of BIM functionality [31]                                   |                                            | Reservations  | Extent of application of BIM functionality [31]                                   |
| 2             | BIM collaborative design [33]                                                     |                                            | Reservations  | BIM collaborative design [33]                                                     |
| 3             | BIM precast splitting [35]                                                        |                                            | Reservations  | BIM precast splitting [35]                                                        |
| 4             | BIM modeling depth [37]                                                           |                                            | Reservations  | BIM modeling depth [37]                                                           |
| 5             | BIM deepening design [1]                                                          | Deepen the design [30]                     | Incorporation | BIM deepening design [1]                                                          |
| 6             | BIM software data interactivity [41]                                              | Data interface standard [30]               | Incorporation | BIM software data interactivity [41]                                              |
| 7             | Standardized and universal design of components [43]                              |                                            |               | Standardized and universal design of components [43]                              |
| 8             | Intelligent component production line [44]                                        | Automated manufacturing [30]               | Incorporation | Intelligent component production line [44]                                        |
| 9             | BIM-based scheduling [45]                                                         |                                            | Reservations  | BIM-based scheduling [45]                                                         |
| 10            | Component transportation costs, route optimization [46]                           |                                            | Reservations  | Component transportation costs, route optimization [46]                           |
| 11            | IoT technology for component information collection and quality traceability [47] |                                            |               | IoT technology for component information collection and quality traceability [47] |
|               |                                                                                   | Traceability of components [30]            | Incorporation |                                                                                   |
|               |                                                                                   | Component organization management [30]     | Removing      |                                                                                   |
| 12            | Visualization of technical briefings [48]                                         |                                            | Reservations  | Visualization of technical briefings [48]                                         |
| 13            | Construction site dynamic layout simulation [49]                                  |                                            | Reservations  | Construction site dynamic layout simulation [49]                                  |
| 14            | 4D virtual build construction solution optimization [50]                          | BIM Construction Simulation [30]           | Incorporation | 4D virtual build construction solution optimization [50]                          |
| 15            | Progress simulation optimization [52]                                             | Progress management [30]                   | Incorporation | Progress simulation optimization [52]                                             |
| 16            | Deformation monitoring informatization [11]                                       |                                            | Reservations  | Deformation monitoring informatization [11]                                       |
| 17            | Automated monitoring of deep foundation pits and adjacent edges [54]              |                                            | Reservations  | Automated monitoring of deep foundation pits and adjacent edges [54]              |

|    |                                                                                                 |                                                              |               |                                                                                                |
|----|-------------------------------------------------------------------------------------------------|--------------------------------------------------------------|---------------|------------------------------------------------------------------------------------------------|
| 18 | Intelligent grouting and lifting equipment [55,56]                                              |                                                              | Reservations  | Intelligent grouting and lifting equipment [55,56]                                             |
| 19 | Robotic applications such as construction robotics and autonomous measuring robotics, etc. [18] |                                                              | Reservations  | Robotic applications such as construction robotics and autonomous measuring robotics, etc.[18] |
| 20 | Training and education of VR safety [58]                                                        | Security education management [30]                           | Incorporation | Training and education of VR safety [58]                                                       |
| 21 | Personnel security behavior monitoring [59]                                                     | Video surveillance[30]                                       | Incorporation | Personnel security behavior monitoring [59]                                                    |
| 22 | System for determining the real name of laborers [60]                                           | System for identifying users [30]                            | Incorporation | System for determining the real name of laborers [60]                                          |
| 23 |                                                                                                 | Attendance management [30]                                   | Reservations  | Attendance management [30]                                                                     |
| 24 |                                                                                                 | Wage regulation [30]                                         | Reservations  | Wage regulation [30]                                                                           |
| 25 |                                                                                                 | Statistical analysis of labour force data [30]               | Reservations  | Statistical analysis of labour force data [30]                                                 |
| 26 | Stockpile planning [32]                                                                         | Material identification and location [30]                    | Incorporation | Stockpile planning [32]                                                                        |
| 27 | A system for engineering resource management [34]                                               | Material whole process supervision platform [30]             | Incorporation | A system for engineering resource management [34]                                              |
| 28 | Monitoring of large equipment safety operations [36]                                            | Equipment intelligent scheduling management [30]             | Incorporation | Monitoring of large equipment safety operations [36]                                           |
| 29 | Management of Scaffolding engineering informationization safety [38]                            |                                                              | Reservations  | Management of Scaffolding engineering informationization safety [38]                           |
| 30 | Monitoring of on-site noise and dust informationization [39,40]                                 |                                                              | Reservations  | Monitoring of on-site noise and dust informationization [39,40]                                |
| 31 | Linkage applications for dust reduction, noise reduction and haze reduction [42]                |                                                              | Reservations  | Linkage applications for dust reduction, noise reduction and haze reduction [42]               |
| 32 |                                                                                                 | Identification of construction waste vehicles [30]           | Reservations  | Identification of construction waste vehicles [30]                                             |
| 33 |                                                                                                 | Identification and classification of construction waste [30] | Reservations  | Identification and classification of construction waste [30]                                   |

|    |                                                                   |                                                                    |               |                                                                    |
|----|-------------------------------------------------------------------|--------------------------------------------------------------------|---------------|--------------------------------------------------------------------|
| 34 |                                                                   | Platforms for monitoring and management of construction waste [30] | Reservations  | Platforms for monitoring and management of construction waste [30] |
| 35 |                                                                   | Project cost data acquisition model [30]                           | Reservations  | Project cost data acquisition model [30]                           |
| 36 |                                                                   | An Aanalysis model for Price indicator correlation [30]            | Reservations  | An Aanalysis model for Price indicator correlation [30]            |
| 37 |                                                                   | Visualization and analysis of project cost [30]                    | Reservations  | Visualization and analysis of project cost [30]                    |
| 38 |                                                                   | Platforms for cloud procurement services [30]                      | Reservations  | Platforms for cloud procurement services [30]                      |
| 39 | Contract informatization management [51]                          |                                                                    | Reservations  | Contract informatization management [51]                           |
| 40 | Platform for engineering collaborative management [53]            | Collaborative management information platform [30]                 | Incorporation | Platform for engineering collaborative management [53]             |
|    |                                                                   | Data integration and sharing [30]                                  | Removing      |                                                                    |
|    |                                                                   | Safety and quality management [30]                                 | Removing      |                                                                    |
| 41 |                                                                   | System integration capabilities [30]                               | Reservations  | System integration capabilities [30]                               |
| 42 | Real-time information collection for collaborative management [5] | On-site information collection [30]                                | Incorporation | Real-time information collection for collaborative management [5]  |
| 43 | Methods of Data acquisition [57]                                  |                                                                    | Reservations  | Methods of Data acquisition [57]                                   |
| 44 | Automatic data processing [30]                                    | Automatic data processing [30]                                     | Reservations  | Automatic data processing [30]                                     |
| 45 | Interactivity of Hardware and software [41]                       |                                                                    | Reservations  | Interactivity of Hardware and software [41]                        |
| 46 |                                                                   | Information management for Cloud deployment (cloud computing)[30]  | Reservations  | Information management for Cloud deployment (cloud computing)[30]  |

---

Table S2. Evaluation criteria for qualitative indicators

| Secondary indicators | Initial level                                                                                              | Development level                                                                                                                                                     | Normative level                                                                                                                                 | Continuous optimization level                                                                                                          |
|----------------------|------------------------------------------------------------------------------------------------------------|-----------------------------------------------------------------------------------------------------------------------------------------------------------------------|-------------------------------------------------------------------------------------------------------------------------------------------------|----------------------------------------------------------------------------------------------------------------------------------------|
| C12                  | Without collaborative design                                                                               | Collaborative design based on 2D drawings and challenging professional collaboration                                                                                  | 3D co-design with multi-software interaction                                                                                                    | BIM collaborative design based on informatization platforms                                                                            |
| C13                  | Split design based on 2D                                                                                   | Inverse 3D disassembly design based on a library of Prefabricated components                                                                                          | 3D split design guided by a library of prefabricated components                                                                                 | BIM forward design guided by a library of prefabricated coomponents                                                                    |
| C14                  | Absence of 3D modeling or simply 3D image modeling                                                         | The quantity of information presented in the model aligns with that specified on the construction drawings                                                            | Precise component dimensions accompanied by additional information regarding the components' production, transportation, assembly and so forth. | The model carries comprehensive information, includes changes during construction, and corresponds to the actual construction content. |
| C15                  | Not involving                                                                                              | Inadequate data interactivity and issues of data loss and corruption                                                                                                  | Improved data interactivity; imported data can be used after simple modifications                                                               | Excellent data interactivity; imported data are complete, which can be used directly                                                   |
| C16                  | The degree of standardization and modularization of prefabricated components and parts is particularly low | An average degree of standardization and modularization of prefabricated components and parts                                                                         | A high degree of standardization and modularization of prefabricated components and parts                                                       | Remarkably high degree of standardization and modularization of prefabricated components and parts                                     |
| C21                  | Pure component construction site transferred to factory                                                    | Manual assembly line production                                                                                                                                       | Production by automated assembly lines with reduced reliance on human labor                                                                     | Unmanned industrial manufacturing                                                                                                      |
| C22                  | Planning for passive production, using the construction unit's purchased goods as a guide                  | While interaction with the designer regarding component information does occur, the majority of the products are still manufactured according to the builder's order. | Interaction with design and construction data, which allows the determination of production schedules                                           | Data interconnection, automation plans                                                                                                 |
| C23                  | Conventional logistics and transportation solutions                                                        | Monitoring of logistics using technologies such as the Internet of Things                                                                                             | Optimization of transport route selection using IoT, GIS and other technologies                                                                 | Informatization of the whole process management of loading, unloading, transportation and stacking of components                       |
| C24                  | Unattainable                                                                                               | Traceability of                                                                                                                                                       | Traceability of                                                                                                                                 | Traceability of dynamic component                                                                                                      |

|     |                                                                              |                                                                                                                                     |                                                                                                                                                                |                                                                                                                                                                                     |
|-----|------------------------------------------------------------------------------|-------------------------------------------------------------------------------------------------------------------------------------|----------------------------------------------------------------------------------------------------------------------------------------------------------------|-------------------------------------------------------------------------------------------------------------------------------------------------------------------------------------|
|     | traceability possible                                                        | location information                                                                                                                | Positioning and quality information                                                                                                                            | information combined with BIM technology                                                                                                                                            |
| C32 | Human monitoring                                                             | Less accurate monitoring due to deficiencies in monitoring and surveillance facilities such as sensors                              | Improved and more accurate monitoring based on advanced monitoring facilities including sensors                                                                | Monitoring based on the integration of information technology is exceptionally effective and highly accurate, which allows timely and early warning                                 |
| C33 | Conventional equipment is applied solely                                     | A small quantity of smart equipment is applied.                                                                                     | A high quantity of smart equipment is applied.                                                                                                                 | A huge quantity of smart equipment is applied.                                                                                                                                      |
| C41 | Safety officer administration and management; conventional safety education. | Monitoring and surveillance records are archived; instructions regarding safety are displayed on the screen.                        | Real-time hazard alerts for monitoring and surveillance facilities                                                                                             | Monitoring and surveillance facilities as well as smart wearable devices are used for monitoring real-time personnel health status and hazard sources to issue timely warnings.     |
| C42 | Verification of team size per shift and summarization of site leaders        | Project access through gates for real names of laborers                                                                             | Attendance and payroll statistics based on the real name system of labor services                                                                              | Monitoring and analysis of labor information using big data                                                                                                                         |
| C43 | Little informatization supervision is performed on material types.           | A moderate quantity of informatization supervision is performed on material types.                                                  | A fair quantity of informatization supervision is performed on material types.                                                                                 | A significant quantity of informatization supervision is performed on material types.                                                                                               |
| C44 | Routine Manual inspection                                                    | Less accurate monitoring due to deficiencies in monitoring and surveillance facilities such as sensors                              | Improved and more accurate monitoring based on advanced monitoring facilities including sensors                                                                | Highly effective monitoring based on a variety of information technology, which enables timely early warning                                                                        |
| C51 | Spot-check supervision by the environmental protection department            | Establishment of a construction schedule; frequent water spraying to reduce pollution, etc.                                         | Implementation of real-time monitoring, intelligent watering, and intervention in construction time in the project                                             | Real-time delivery of environmental protection information via a connection to the environmental protection system                                                                  |
| C52 | Unregulated                                                                  | Human supervision of construction waste transportation vehicles' attention to sanitary conditions and punctuality while on the road | License plate recognition technology automatically collects and screens vehicle license plate information; radio frequency technology for waste classification | Realization of dynamic and visual monitoring of information regarding transportation, vehicle positioning and etc., based on technologies including GIS, GPS and Internet of Things |
| C61 | Conventional cost management                                                 | Cost management using BIM technology                                                                                                | Trend analysis and early warning of cost indicators using visual analysis techniques                                                                           | Collection and mining of cost data for macro-control of costs using big data technology                                                                                             |
| C62 | Conventional offline procurement model                                       | BIM technology for rapid quantity calculation and pricing for                                                                       | Procurement models incorporating BIM technology and e-commerce                                                                                                 | A cloud computing-based procurement model that incorporates BIM technology and ecommerce                                                                                            |

|     |                                            |                                                                                                |                                                                                                                                                   |                                                                                                                                             |
|-----|--------------------------------------------|------------------------------------------------------------------------------------------------|---------------------------------------------------------------------------------------------------------------------------------------------------|---------------------------------------------------------------------------------------------------------------------------------------------|
| C63 | Conventional contract management model     | procurement<br>Contract informatization<br>online archiving and consulting services            | Contract information is archived and accessed based on the privilege.                                                                             | Dynamic, collaborative and networked contract management based on the contract information management platform                              |
| C71 | None                                       | Less functionality, full process system not connected                                          | More comprehensive functionality, encompassing the entire process<br>Data transfer is fast enough to satisfy the requirements of decision-making  | Comprehensive-functionality; integrated management of the entire process                                                                    |
| C72 | Based on manual work efficiency            | Delay in data transmission                                                                     |                                                                                                                                                   | Immediate, real-time delivery                                                                                                               |
| C73 | Field data collection using human judgment | Less intelligent methods of information collection, heavily rely on human                      | More intelligent means of information collection, have limited reliance on human                                                                  | Extensive implementation of intelligent methods to collect information, which eradicates the necessity for human involvement in the process |
| C74 | Manual operation                           | Manual processing, computer-assisted processing                                                | Computerized processing, manual assistance                                                                                                        | Big data analytics processing, highly efficient data processing                                                                             |
| C75 | No software interaction involved           | Poor interaction between hardware and software disrupts normal operation                       | Average interactivity between hardware and software, but basically functional                                                                     | The hardware and software interact fairly well and are able to function properly                                                            |
| C76 | None                                       | Utilization of public cloud leads to low level of data security; certain functions become idle | By employing a hybrid cloud, services are independently managed based on their levels of significance; certain obstacles hinder data interaction. | Utilization of private cloud; customized service features; high level of data security                                                      |

---

**Survey concerning the significance of evaluation indicators for assessing informatization maturity in assembly building projects**

Respected Sir or Madam:

Greetings! I am a master's student at Nanjing Forestry University engaged in the composition of a dissertation with the following title: "Evaluation of Information Technology Maturity of Assembly Building Projects Based on CMM-CME Methodology — — Take a project in China as an example". The purpose of this questionnaire is to investigate "the degree of significance of the evaluation indexes for assessing the informationization maturity in assembly building projects".

Following literature review and data analysis, this paper assesses the maturity of informatization in assembled building projects from seven first-level indicators and 28 second-level indicators, namely, design informatization, production and transportation informatization, construction and assembly informatization, man-material-machine management informatization, environment management informatization, business management informatization, and project collaboration management informatization. In order to optimize the evaluation indexes, please rate the significance of each evaluation index on the maturity of informationization in assembled building projects.

Your support and engagement will be critical to the achievement of this study; herein you are asked to kindly complete the questionnaire meticulously according to your expertise and background. Moreover, we sincerely hope that you will encourage your acquaintances and colleagues who have engaged in projects similar to the research content of this paper to contribute to this survey. Any information you provide will be treated as confidential and utilized exclusively for academic research purposes.

Your cooperation is greatly appreciated!

Best of luck in your profession and life!

Nanjing Forestry University  
August 2022

**Part I:** Basic information regarding the individuals being surveyed and their organization

1. Your academic background:\_\_\_\_\_  
A. High school and below B. Specialized C. Bachelor's degree D. Master's or higher degree
2. Your job title:  
A. Junior B. Intermediate C. Senior D. Other
3. The type of your organization:\_\_\_\_\_  
A. Departments of government B. Construction units C. Design units D. Construction units E. Supervision units F. Units of Component production G. Consulting units H. Scientific research units and academic institutions I. Others
4. The duration of your employment in the construction industry:\_\_\_\_\_  
A. 1 year and below B. 2-4 years C. 5-8 years D. More than 8 years
5. The number of years you have been engaged in assembly building related business:\_\_\_\_\_  
A. 1 year or less B. 2-4 years C. 5-8 years D. Over 8 years
6. Your level of knowledge about assembly building projects:\_\_\_\_\_  
A. Extremely well known B. Comparatively well known C. Generally well known D. Not very well known E. Not at all well known
7. Your proficiency in understanding informatization construction for assembly building projects:\_\_\_\_\_  
A. Extremely well-known B. Comparatively well-known C. Generally well-known D. Not particularly well-known E. Completely unknown
8. Your understanding upon smart construction:\_\_\_\_\_  
A. Extremely well-known B. Comparatively well-known C. Generally well-known D. Not particularly well-known E. Completely unknown

**Part II:** This section focuses on evaluating the significance of the 28 secondary indicators. Please assess the importance of the maturity of information technology in assembly building projects, as suggested by the indicators, using your personal experience and the current status of information technology in building such projects as a guide. Please indicate your rating with a "√" in the corresponding table. (The evaluation process is based on a 5-point Likert scale, where 1 indicates "negligible", 2 indicates "unimportant", 3 indicates "generally important", 4 means "important", and 5 indicates "extremely important".)

| Secondary indicators                                | Negligible<br>(1) | Unimportant<br>(2) | Generally<br>important<br>(3) | Important<br>(4) | Extremely<br>important<br>(5) | Note                         |
|-----------------------------------------------------|-------------------|--------------------|-------------------------------|------------------|-------------------------------|------------------------------|
| The degree of application of BIM design performance |                   |                    |                               |                  |                               | Implement BIM technology for |

|                                                           |  |  |  |  |  |                                                                                                                           |
|-----------------------------------------------------------|--|--|--|--|--|---------------------------------------------------------------------------------------------------------------------------|
|                                                           |  |  |  |  |  | analysis of the site, the sunlight, the wind, the noise, program comparison, etc.                                         |
| BIM collaborative design                                  |  |  |  |  |  | Degree of collaborative design among architectural, structural, plumbing, electrical, and renovation disciplines          |
| Split design of prefabricated components                  |  |  |  |  |  | Level of Informatization regarding prefabricated component splitting methods                                              |
| BIM modeling accuracy                                     |  |  |  |  |  | Level of details of building information modeling (LOD100, LOD200, LOD300, LOD400, LOD500)                                |
| BIM software data interactivity                           |  |  |  |  |  | Data interactivity between software used in the design process                                                            |
| Standardized design of components                         |  |  |  |  |  | Degree of generalization, standardization and serialization of component design                                           |
| Informatization of production equipment                   |  |  |  |  |  | Prefabricated components production automation, intelligent degree, unmanned factory production                           |
| Component production scheduling informationization        |  |  |  |  |  | Degree of informatization of production scheduling, degree of interactions among design, production and construction data |
| Informatization of the component transportation programme |  |  |  |  |  | Optimization of logistics solutions based on the Internet of Things                                                       |
| Informationization of component traceability              |  |  |  |  |  | Degree of application of                                                                                                  |

|                                                  |  |  |  |  |  |                                                                                                                                                                                                                                  |
|--------------------------------------------------|--|--|--|--|--|----------------------------------------------------------------------------------------------------------------------------------------------------------------------------------------------------------------------------------|
|                                                  |  |  |  |  |  | information technology in component identification, positioning and stacking planning                                                                                                                                            |
| Construction assembly plan informatization       |  |  |  |  |  | Degree of application of information technology such as 3D delivery, construction site dynamic layout simulation, construction plan optimization using 4D virtual construction, 4D progress simulation, etc.                     |
| Construction equipment informatization           |  |  |  |  |  | The degree of informationized monitoring of grouting compactness, deep foundation pits, highly supported molds, and adjacent engineering works                                                                                   |
| Construction equipment informatization           |  |  |  |  |  | The level of informatization of grouting, lifting and other equipment, the degree of application of intelligent equipment including s BIM CNC processing and automatic arrangement of reinforcement bars, measuring robots, etc. |
| Informatization of personnel security management |  |  |  |  |  | Using VR, AI and other virtual reality technologies to monitor the safety behavior of personnel, identify hazards and issue action alerts                                                                                        |
| Labor monitoring informatization                 |  |  |  |  |  | Degree of informatization of                                                                                                                                                                                                     |

|                                                                     |  |  |  |  |  |                                                                                                                                                   |
|---------------------------------------------------------------------|--|--|--|--|--|---------------------------------------------------------------------------------------------------------------------------------------------------|
|                                                                     |  |  |  |  |  | the real name system of labor (attendance, payroll, labor data management)                                                                        |
| Material supervision informatization                                |  |  |  |  |  | BIM, IoT RF technology applications, stockpile planning                                                                                           |
| Informatization of machinery and equipment safety monitoring        |  |  |  |  |  | The quantity of sensors, monitoring and other instruments, big data analysis, and hazard warning                                                  |
| Environmental monitoring informatization                            |  |  |  |  |  | Visualization of Dust, noise, water and other elements via remote supervision; intelligent linkage between the relevant departments               |
| Informatization of construction waste regulation                    |  |  |  |  |  | Comprehensive monitoring of construction waste using technologies such as GIS and Internet of Things (IoT)                                        |
| Informatization of an Engineering collaborative management platform |  |  |  |  |  | Integrity and intelligence of platform functions                                                                                                  |
| Collaborative management information collection in real time        |  |  |  |  |  | Timeliness of information collection                                                                                                              |
| Informatization of data collection methods                          |  |  |  |  |  | Information collection methods, such as the application of BIM, RFID, NFC, drones, etc.                                                           |
| Data processing informatization                                     |  |  |  |  |  | Capabilities to automatically generate, summarize and query data, on the amount of labor and materials consumed at various stages of construction |
| Interactivity of hardware and software                              |  |  |  |  |  | Matchability between hardware and software                                                                                                        |

|                                         |  |  |  |  |  |                                                                                                                                 |
|-----------------------------------------|--|--|--|--|--|---------------------------------------------------------------------------------------------------------------------------------|
| Cloud deployment information management |  |  |  |  |  | An approach based on Cloud computing that improves information resource utilization and thus reduces the cost of it             |
| Cost management informatization         |  |  |  |  |  | A capability of cost management of engineering projects based on the cost management informationization and big data technology |
| Procurement management informatization  |  |  |  |  |  | Procurement informatization using cloud computing technology and e-commerce models.                                             |
| Contract management informatization     |  |  |  |  |  | Information management of construction contracts, including electronic contracts.                                               |

**Part III:** Observations and recommendations
